# Supplementary material for: Role of O–H⋯O/S conventional hydrogen bonds in considerable Csp2–H blue-shift in the binary systems of acetaldehyde and thioacetaldehyde with substituted carboxylic and thiocarboxylic acids
Source: Royal Society of Chemistry journal article supplement (doi:10.1039/d2ra05391h), 2022-01-01
Supplement: d2ra05391h1.pdf [file d2ra05391h1.pdf]

## Supporting Information

### Role of O–H···O/S conventional hydrogen bonds in considerable C<sub>sp2</sub>–H blue-shift in the binary systems of acetaldehyde and thioacetaldehyde with the substituted carboxylic and thiocarboxylic acids

Nguyen Truong An<sup>1</sup>, Nguyen Thi Duong<sup>1</sup>, Nguyen Ngoc Tri,<sup>1,2</sup> Nguyen Tien Trung<sup>1,2\*</sup>

<sup>1</sup>Faculty of Natural Sciences, Quy Nhon University, Quy Nhon, Vietnam,

<sup>2</sup>Laboratory of Computational Chemistry and Modelling (LCCM), Quy Nhon University, Quy Nhon, Vietnam

\* Corresponding author: Email: [nguyentientrung@qnu.edu.vn](mailto:nguyentientrung@qnu.edu.vn)

Table S1. Intermolecular parameters (r: distances in Å, θ: angles in °, q: NBO charge in e) in the binary systems formed between CH<sub>3</sub>CHZ and RCZOH (R = CH<sub>3</sub>, H, F; Z = O, S) at MP2/6–311++G(3df,2pd)

| Complex             | r(H···Z) (Å) |                          | θ (°)  |                        | q (e)  |                 |        |                 |
|---------------------|--------------|--------------------------|--------|------------------------|--------|-----------------|--------|-----------------|
|                     | O–H···Z7     | C <sub>sp2</sub> –H···Z2 | ∠O–H–Z | ∠C <sub>sp2</sub> –H–Z | Z2     | H <sup>a)</sup> | Z7     | H <sup>b)</sup> |
| CH <sub>3</sub> O–O | 1.747        | 2.337                    | 179.5  | 130.3                  | -0.621 | 0.502           | -0.546 | 0.139           |
| CH <sub>3</sub> S–O | 1.720        | 2.826                    | 170.2  | 128.2                  | -0.119 | 0.507           | -0.544 | 0.128           |
| HO–O                | 1.727        | 2.359                    | 179.7  | 130.4                  | -0.607 | 0.500           | -0.547 | 0.138           |
| HS–O                | 1.706        | 2.837                    | 171.5  | 129.1                  | -0.115 | 0.502           | -0.545 | 0.127           |
| FO–O                | 1.666        | 2.389                    | 179.0  | 127.9                  | -0.615 | 0.510           | -0.550 | 0.138           |
| FS–O                | 1.639        | 2.846                    | 172.2  | 127.5                  | -0.148 | 0.516           | -0.547 | 0.131           |
| CH <sub>3</sub> O–S | 2.265        | 2.233                    | 177.9  | 146.7                  | -0.613 | 0.482           | 0.067  | 0.207           |
| CH <sub>3</sub> S–S | 2.246        | 2.718                    | 167.7  | 145.1                  | -0.098 | 0.485           | 0.082  | 0.195           |
| HO–S                | 2.242        | 2.252                    | 178.8  | 146.8                  | -0.598 | 0.478           | 0.070  | 0.205           |
| HS–S                | 2.228        | 2.722                    | 169.2  | 150.0                  | -0.093 | 0.478           | 0.084  | 0.194           |
| FO–S                | 2.180        | 2.282                    | 179.8  | 143.6                  | -0.607 | 0.486           | 0.079  | 0.205           |
| FS–S                | 2.164        | 2.741                    | 170.1  | 143.7                  | -0.126 | 0.490           | 0.093  | 0.195           |

<sup>a)</sup>For H of –OH group of RCZOH in the complexes; <sup>b)</sup>For H of –CHZ group of CH<sub>3</sub>CHZ in the complexes

Table S2. Selected parameters at the BCPs of intermolecular contacts at MP2/6-311++G(3df,2pd)

| Complex             | ρ(r <sub>C</sub> ), in au |                          | ∇ <sup>2</sup> ρ(r <sub>C</sub> ), in au |       | H(r <sub>C</sub> ) <sup>a)</sup> , in au |        | E <sub>HB</sub> <sup>b)</sup> , in kJ.mol <sup>-1</sup> |       | Comparison values  |
|---------------------|---------------------------|--------------------------|------------------------------------------|-------|------------------------------------------|--------|---------------------------------------------------------|-------|--------------------|
|                     | O–H···Z7                  | C <sub>sp2</sub> –H···Z2 | (1)                                      | (2)   | (1)                                      | (2)    | (1)                                                     | (2)   |                    |
| CH <sub>3</sub> O–O | 0.0405                    | 0.0130                   | 0.097                                    | 0.045 | -0.0073                                  | 0.0012 | -51.0                                                   | -11.4 | 2.1 <sup>(1)</sup> |
| CH <sub>3</sub> S–O | 0.0428                    | 0.0102                   | 0.100                                    | 0.027 | -0.0084                                  | 0.0008 | -55.0                                                   | -6.8  | 2.2 <sup>(1)</sup> |
| HO–O                | 0.0427                    | 0.0125                   | 0.098                                    | 0.042 | -0.0084                                  | 0.0011 | -54.5                                                   | -10.9 | 2.1 <sup>(1)</sup> |
| HS–O                | 0.0444                    | 0.0099                   | 0.101                                    | 0.027 | -0.0094                                  | 0.0008 | -57.7                                                   | -6.5  | 2.2 <sup>(1)</sup> |
| FO–O                | 0.0494                    | 0.0115                   | 0.103                                    | 0.040 | -0.0124                                  | 0.0012 | -66.6                                                   | -10.2 | 2.2 <sup>(1)</sup> |
| FS–O                | 0.0521                    | 0.0096                   | 0.105                                    | 0.027 | -0.0142                                  | 0.0009 | -71.8                                                   | -6.4  | 2.3 <sup>(1)</sup> |
| CH <sub>3</sub> O–S | 0.0264                    | 0.0150                   | 0.046                                    | 0.053 | -0.0034                                  | 0.0015 | -23.9                                                   | -13.5 | 1.7 <sup>(2)</sup> |
| CH <sub>3</sub> S–S | 0.0276                    | 0.0118                   | 0.046                                    | 0.031 | -0.0039                                  | 0.0008 | -25.2                                                   | -8.1  | 1.7 <sup>(2)</sup> |
| HO–S                | 0.0278                    | 0.0145                   | 0.046                                    | 0.051 | -0.0040                                  | 0.0014 | -25.6                                                   | -13.0 | 1.6 <sup>(2)</sup> |
| HS–S                | 0.0283                    | 0.0121                   | 0.046                                    | 0.030 | -0.0040                                  | 0.0007 | -25.7                                                   | -8.1  | 1.7 <sup>(2)</sup> |
| FO–S                | 0.0319                    | 0.0133                   | 0.045                                    | 0.048 | -0.0060                                  | 0.0015 | -30.5                                                   | -11.9 | 1.6 <sup>(2)</sup> |
| FS–S                | 0.0330                    | 0.0110                   | 0.044                                    | 0.030 | -0.0065                                  | 0.0009 | -31.7                                                   | -7.6  | 1.6 <sup>(2)</sup> |

<sup>a)</sup> the total electron energy density; <sup>b)</sup> individual energy of each hydrogen bond; <sup>(1)</sup>for O–H···Z7 and <sup>(2)</sup>for C<sub>sp2</sub>–H···Z2  
E<sub>HB</sub> in red for O–H···O7, E<sub>HB</sub> in blue for O–H···S7, E<sub>HB</sub> in yellow highlighted for C<sub>sp2</sub>–H···O2 and E<sub>HB</sub> in normal for C<sub>sp2</sub>–H···S7

Table S3. Summary of stretching frequency changes of C–H bonds involving hydrogen bonds in the complexes

| Complexes                                                                                                                                                      | Level of theory/Experiment | $\Delta\nu(\text{C}_{\text{sp}^3}\text{-H})$ ( $\text{cm}^{-1}$ ) | Ref |
|----------------------------------------------------------------------------------------------------------------------------------------------------------------|----------------------------|-------------------------------------------------------------------|-----|
| $\text{CH}_3\text{CHO}\cdots\text{H}_2\text{O}/\text{CH}_3\text{CHO}\cdots\text{2H}_2\text{O}$                                                                 |                            | 6/-11                                                             |     |
| $\text{CH}_2\text{FCHO}\cdots\text{H}_2\text{O}$                                                                                                               | B3LYP/6-311++G(d,p)        | 10;13                                                             | 1   |
| $\text{CH}_2\text{FCHO}\cdots\text{2H}_2\text{O}$                                                                                                              |                            | -19;-21                                                           |     |
| $\text{CH}_3\text{CFO}\cdots\text{H}_2\text{O}/\text{CH}_3\text{CFO}\cdots\text{2H}_2\text{O}$                                                                 |                            | -2/-23                                                            |     |
| $\text{CH}_3\text{CHS}\cdots\text{H}_2\text{O}$                                                                                                                | MP2/aug-cc-pVDZ            | 16.9                                                              | 2   |
| $\text{CH}_3\text{CHS}\cdots\text{2H}_2\text{O}$                                                                                                               |                            | 26.7                                                              |     |
| $\text{CH}_3\text{CHS}\cdots\text{3H}_2\text{O}$                                                                                                               |                            | 15.6; -23.1                                                       |     |
| $(\text{CH}_3\text{CHO})_2$                                                                                                                                    | M062X/6-311++G(3df,3pd)    | -16, -14, -8                                                      | 3   |
| $\text{CHX}_3\cdots\text{HNO}$ (X = F, Cl, Br)                                                                                                                 | MP2/6-311++G(d,p)          | 7÷41                                                              | 4   |
| $\text{F}_3\text{CH}\cdots\text{H}_2\text{O}$                                                                                                                  | Exp.                       | 20.3; 32.3                                                        | 5   |
| Complexes                                                                                                                                                      | Level of theory/Experiment | $\Delta\nu(\text{C}_{\text{sp}^2}\text{-H})$ ( $\text{cm}^{-1}$ ) | Ref |
| $\text{RCHO}\cdots\text{H}_2\text{O}$<br>(R = H, F, CH <sub>3</sub> , CH <sub>2</sub> F, C <sub>2</sub> H <sub>5</sub> )                                       | B3LYP/6-311++G(d,p)        | 28 ÷ 53                                                           | 6   |
| $\text{CH}_3\text{CHO}\cdots\text{H}_2\text{O}/\text{CH}_3\text{CHO}\cdots\text{2H}_2\text{O}$                                                                 | B3LYP/6-311++G(d,p)        | 52/93                                                             | 1   |
| $\text{CH}_2\text{FCHO}\cdots\text{H}_2\text{O}/\text{CH}_2\text{FCHO}\cdots\text{2H}_2\text{O}$                                                               |                            | 44/61                                                             |     |
| $\text{CH}_3\text{CHS}\cdots\text{H}_2\text{O}$                                                                                                                | MP2/aug-cc-pVDZ            | 24.0                                                              | 2   |
| $\text{CH}_3\text{CHS}\cdots\text{2H}_2\text{O}$                                                                                                               |                            | 33.1                                                              |     |
| $\text{CH}_3\text{CHS}\cdots\text{3H}_2\text{O}$                                                                                                               |                            | 62.2                                                              |     |
| $\text{XCHO}\cdots\text{H}_2\text{Z}$                                                                                                                          | MP2/aug-cc-pVDZ            | 2.9 ÷ 52                                                          | 7   |
| $\text{XCHO}\cdots\text{2H}_2\text{O}$<br>(X = H, F, Cl, Br, CH <sub>3</sub> ; Z = O, S)                                                                       |                            | 4.0 ÷ 92.3                                                        |     |
| $\text{RCHZ}\cdots\text{HCOOH}$<br>(R = H, F, Cl, Br, CH <sub>3</sub> , NH <sub>2</sub> ; Z = O, S)                                                            | MP2/aug-cc-pVDZ            | 81÷96                                                             | 8   |
| $\text{RCHO}\cdots\text{R}'\text{OH}$ (R = NH <sub>2</sub> , CF <sub>3</sub> , CH <sub>3</sub> O,<br>CN, H; R' = H, CH <sub>3</sub> , NH <sub>2</sub> , C(O)H) | MP2/cc-pVTZ                | 23.01 ÷ 92.69                                                     | 9   |
| $(\text{CH}_3\text{CHO})_2$                                                                                                                                    | M062X/6-311++G(3df,3pd)    | 50                                                                | 3   |
|                                                                                                                                                                | MP2/6-311++G(d,p)          | -                                                                 | 10  |
|                                                                                                                                                                | MP2/6-31+G(d)              | 56.3; 56.6                                                        | 11  |
| $\text{HCHO-NH}_2\text{OH}$                                                                                                                                    | Exp.                       | 14.6                                                              | 12  |
| $\text{CH}_3\text{COCHO-NH}_2\text{OH}$                                                                                                                        |                            | 16.3                                                              |     |
| $\text{CHOCHO}\cdots\text{H}_2\text{O}_2$                                                                                                                      | Exp.                       | 28.9                                                              | 13  |
| $\text{CHOCHO}\cdots\text{H}_2\text{O}$                                                                                                                        | Exp.                       | 2.5                                                               | 14  |
| $\text{CHOCHO}\cdots\text{H}_2\text{O}$                                                                                                                        | Exp.                       | 14.7                                                              | 14  |
| 4-fluorobenzaldehyde dimer                                                                                                                                     | Exp.                       | 8                                                                 | 15  |
| 2-methoxybenzaldehyde dimer                                                                                                                                    | Exp.                       | 21                                                                | 16  |
| Complexes                                                                                                                                                      | Level of theory            | $\Delta\nu(\text{C}_{\text{sp}}\text{-H})$ ( $\text{cm}^{-1}$ )   | Ref |
| $\text{C}_2\text{HX}\cdots\text{C}_6\text{H}_6$<br>(X = H, F, Cl, Br, CH <sub>3</sub> , NH <sub>2</sub> )                                                      | MP2/aug-cc-pVDZ            | -15.7 ÷ -24.9                                                     | 17  |
| $\text{C}_2\text{H}_2\cdots\text{C}_2\text{H}_2$                                                                                                               | MP2/aug-cc-pVTZ            | -21                                                               | 18  |
| $\text{C}_2\text{H}_2\cdots\text{HCN}$                                                                                                                         |                            | -61                                                               |     |
| $\text{C}_6\text{H}_6\cdots\text{C}_2\text{H}_2$                                                                                                               |                            | -17                                                               |     |
| $\text{C}_6\text{H}_6\cdots\text{HCN}$                                                                                                                         |                            | -50                                                               |     |

1. A. K. Chandra and T. Zeegers-Huyskens, *J. At. Mol. Opt. Phys.*, 2012, **2012**, e754879.
2. N. T. T. Cuc, H. Q. Dai, N. T. A. Nhung, N. P. Hung and N. T. Trung, *Vietnam J. Chem.*, 2019, **57**, 425–432.
3. T. S. Thakur, M. T. Kirchner, D. Bläser, R. Boese and G. R. Desiraju, *Phys. Chem. Chem. Phys.*, 2011, **13**, 14076–14091.
4. N. T. Trung, T. T. Hue and M. T. Nguyen, *Phys. Chem. Chem. Phys.*, 2009, **11**, 926–933.
5. C. D. Keefe and M. Isenor, *J. Phys. Chem. A*, 2008, **112**, 3127–3132.
6. A. K. Chandra and T. Zeegers-Huyskens, *J. Comput. Chem.*, 2012, **33**, 1131–1141.
7. N. T. T. Cuc, C.-T. D. Phan, N. T. A. Nhung, M. T. Nguyen, N. T. Trung and V. T. Ngan, *J. Phys. Chem. A*, 2021, **125**, 10291–10302.
8. N. T. Trung, P. N. Khanh, A. J. P. Carvalho and M. T. Nguyen, *J. Comput. Chem.*, 2019, **40**, 1387–1400.
9. D. Kaur and R. Kaur, *J. Chem. Sci.*, 2015, **127**, 1299–1313.
10. A. Kovács, A. Szabó, D. Nemesok and I. Hargittai, *J. Phys. Chem. A*, 2002, **106**, 5671–5678.
11. Y. Yang and W. Zhang, *Acta Chim. Sin.*, 2009, **67**, 599–606.
12. B. Golec, M. Sałdyka and Z. Mielke, *Mol. Basel Switz.*, 2021, **26**, 1144.
13. M. Mucha and Z. Mielke, *Chem. Phys. Lett.*, 2009, **482**, 87–92.
14. M. Mucha and Z. Mielke, *J. Phys. Chem. A*, 2007, **111**, 2398–2406.
15. P. J. A. Ribeiro-Claro, M. P. M. Marques and A. M. Amado, *ChemPhysChem*, 2002, **3**, 599–606.
16. P. J. A. Ribeiro-Claro, M. G. B. Drew and V. Félix, *Chem. Phys. Lett.*, 2002, **356**, 318–324.
17. P. Khanh, V. Ngan, N. Man, N. T. Ai Nhung, A. Chandra and N. Trung, *RSC Adv.*, 2016, **6**, 106662–106670.
18. P. Jantimapornkij, P. Jundee, N. Uttamapinant, S. Pianwanit and A. Karpfen, *Comput. Theor. Chem.*, 2012, **999**, 231–238.

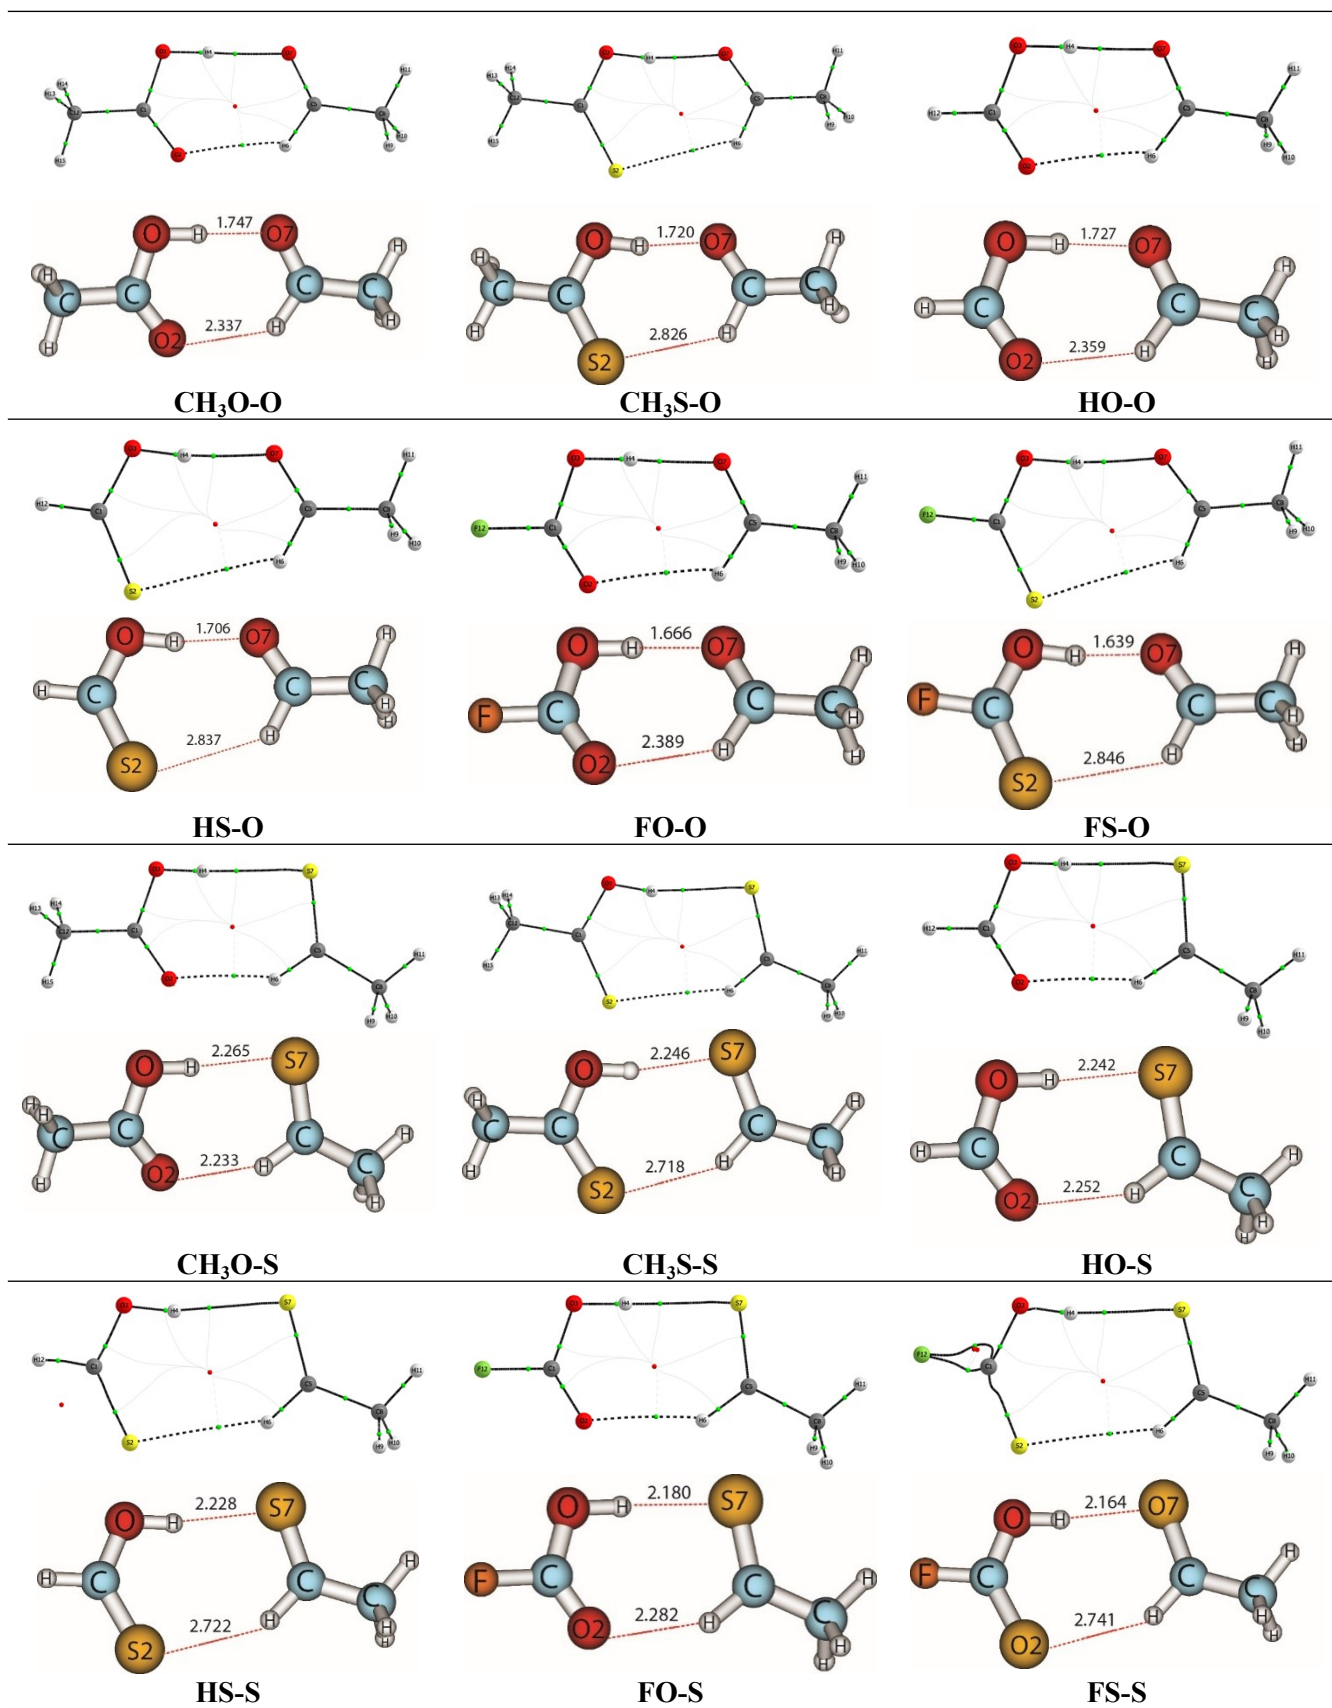

Figure. S1. Topological geometries and stable structures of complexes plotted at MP2/6-311++G(3df,2pd) (values of distance in Å)

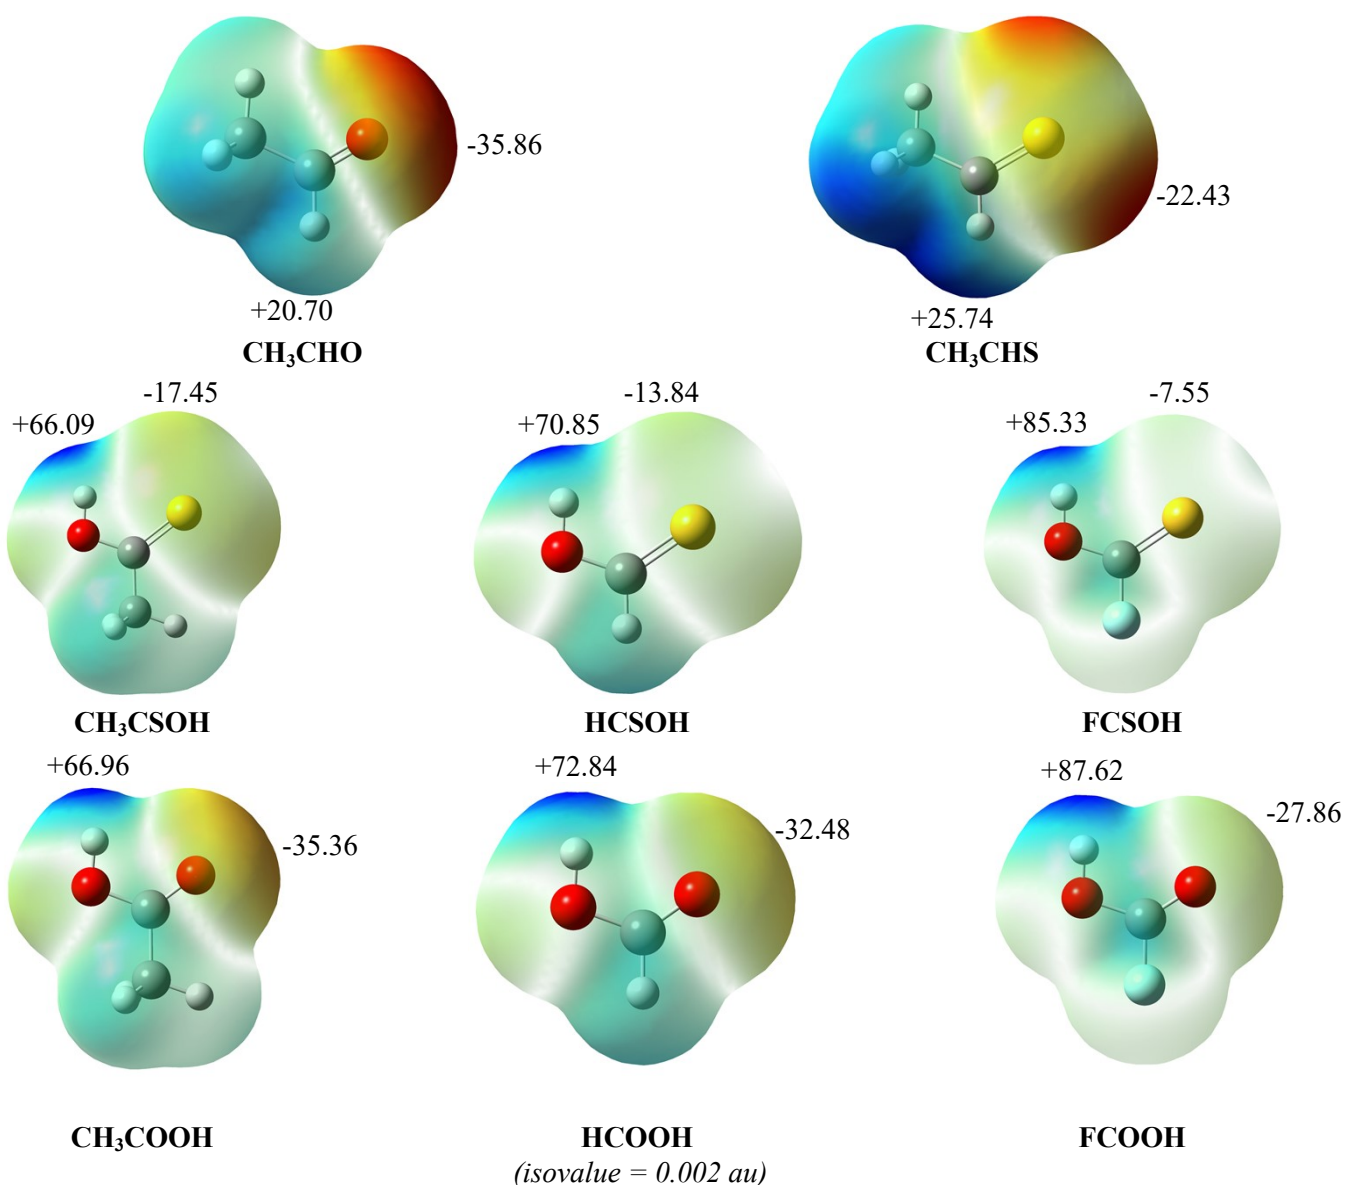

Figure. S2. Molecular electrostatic potential (in  $\text{kcal.mol}^{-1}$ ) of the  $\text{CH}_3\text{CHZ}$  and  $\text{RCZOH}$  ( $\text{R} = \text{CH}_3, \text{H}, \text{F}; \text{Z} = \text{O}, \text{S}$ ) at MP2/6-311++G(3df,2pd) level

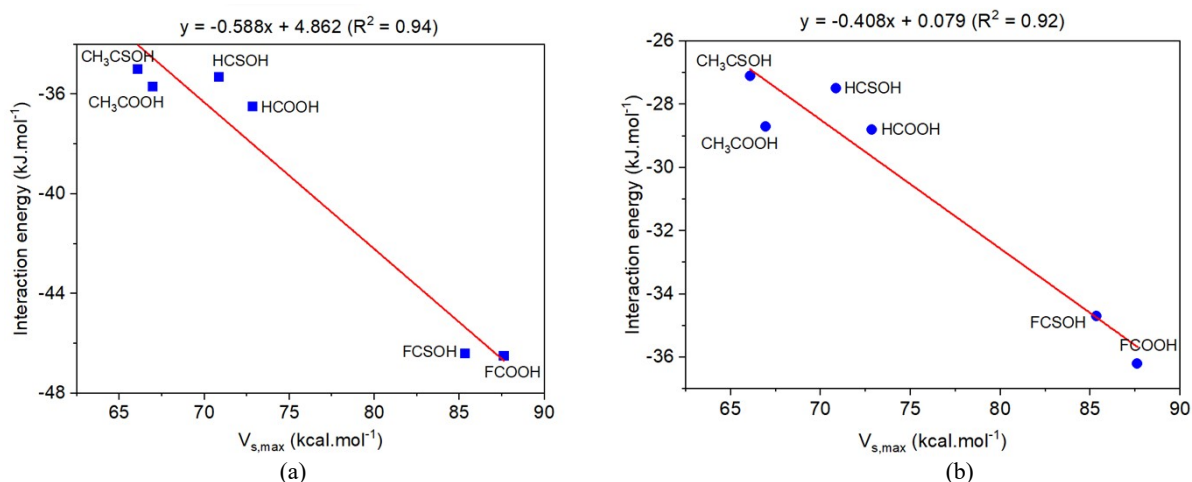

Figure. S3. Relationship of the interaction energies of the investigated complexes for  $\text{CH}_3\text{CHO}$ -complexes (a) and for  $\text{CH}_3\text{CHS}$ -complexes (b) with electrostatic potential of H atom in monomers acting as proton donor at MP2/6-311++G(3df,2pd) level.



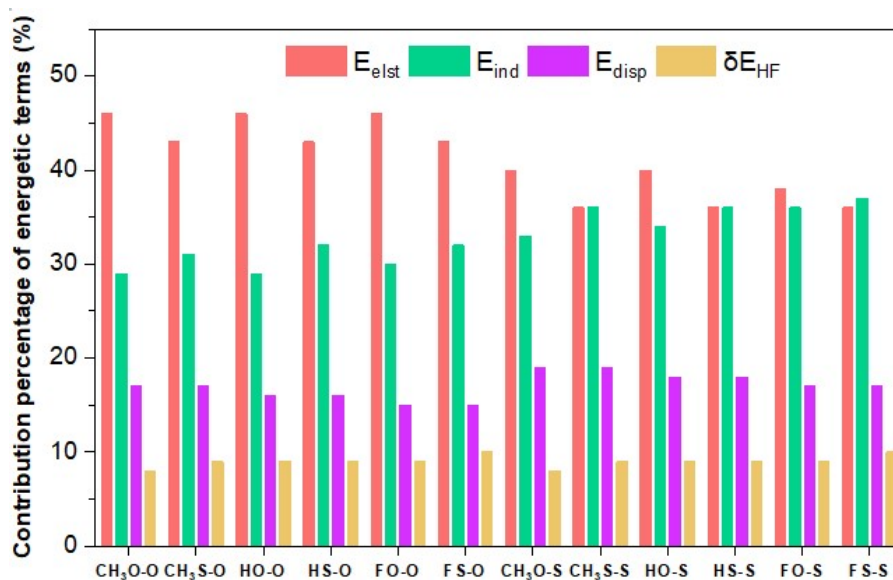

Figure. S4. Diagram for contribution percentage of different energy components into total stabilization energy of the complexes for  $RCZOH \cdots CH_3CHZ$ , with  $R = CH_3, H, F$ ;  $Z = O, S$

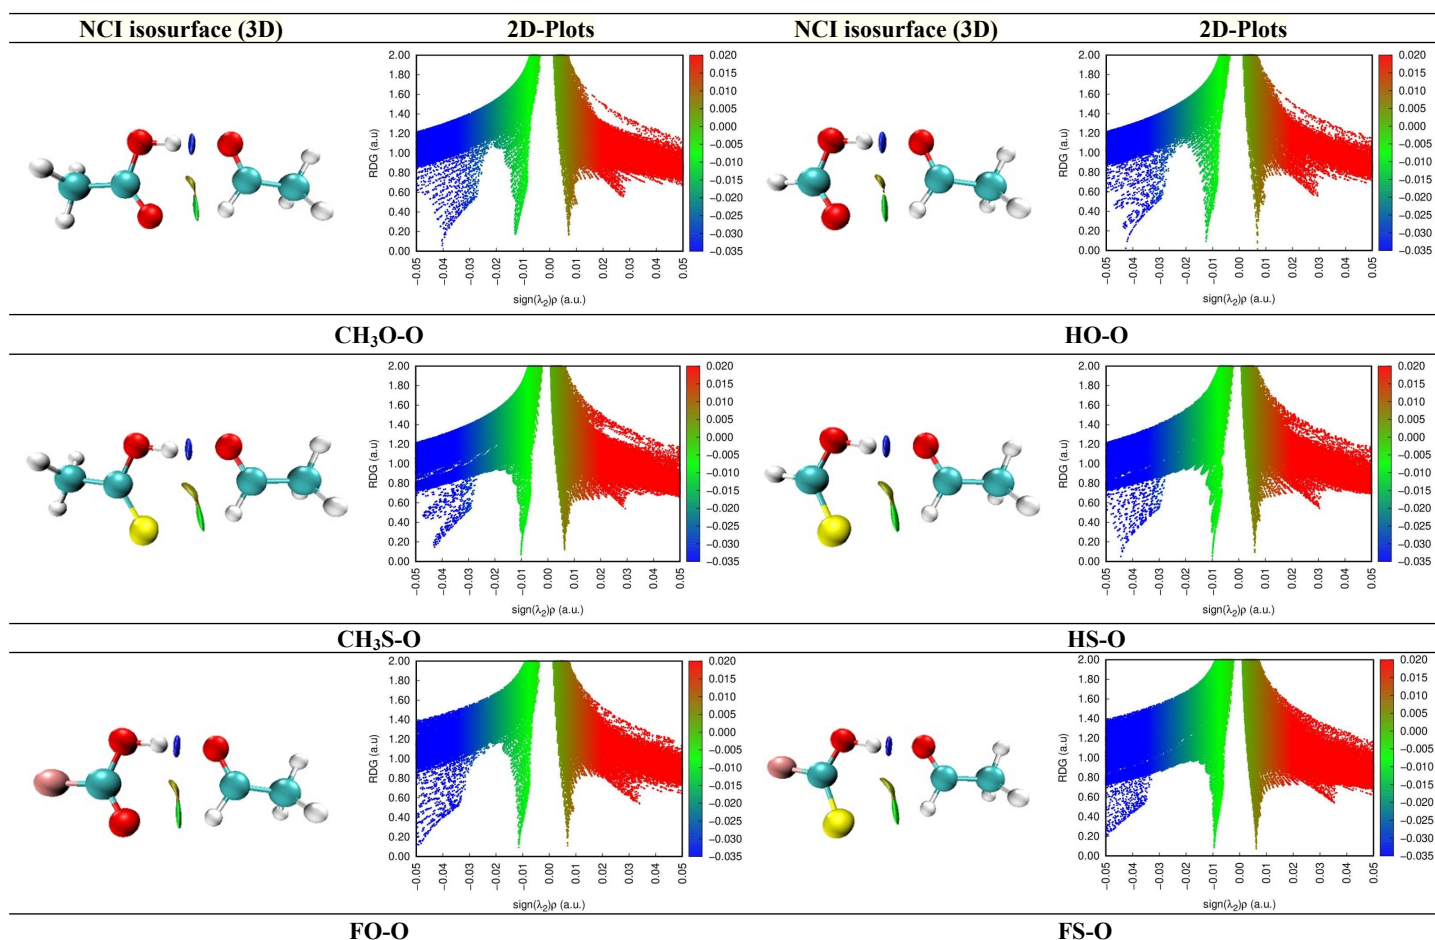

Figure. S5a. NCI isosurface and 2D-plots of reduced density gradient (RDG) versus the electron density multiplied by the sign of the second Hessian eigenvalue ( $sign(\lambda_2)\rho(r_C)$ ) for  $RZ-O$  complexes, with  $R = CH_3, H, F$ ; and  $Z = O, S$ .  
(The surfaces are colored on a blue-green-red scale according to the values of  $sign(\lambda_2)\rho(r_C)$  ranging from  $-0.05$  to  $0.05$  au)

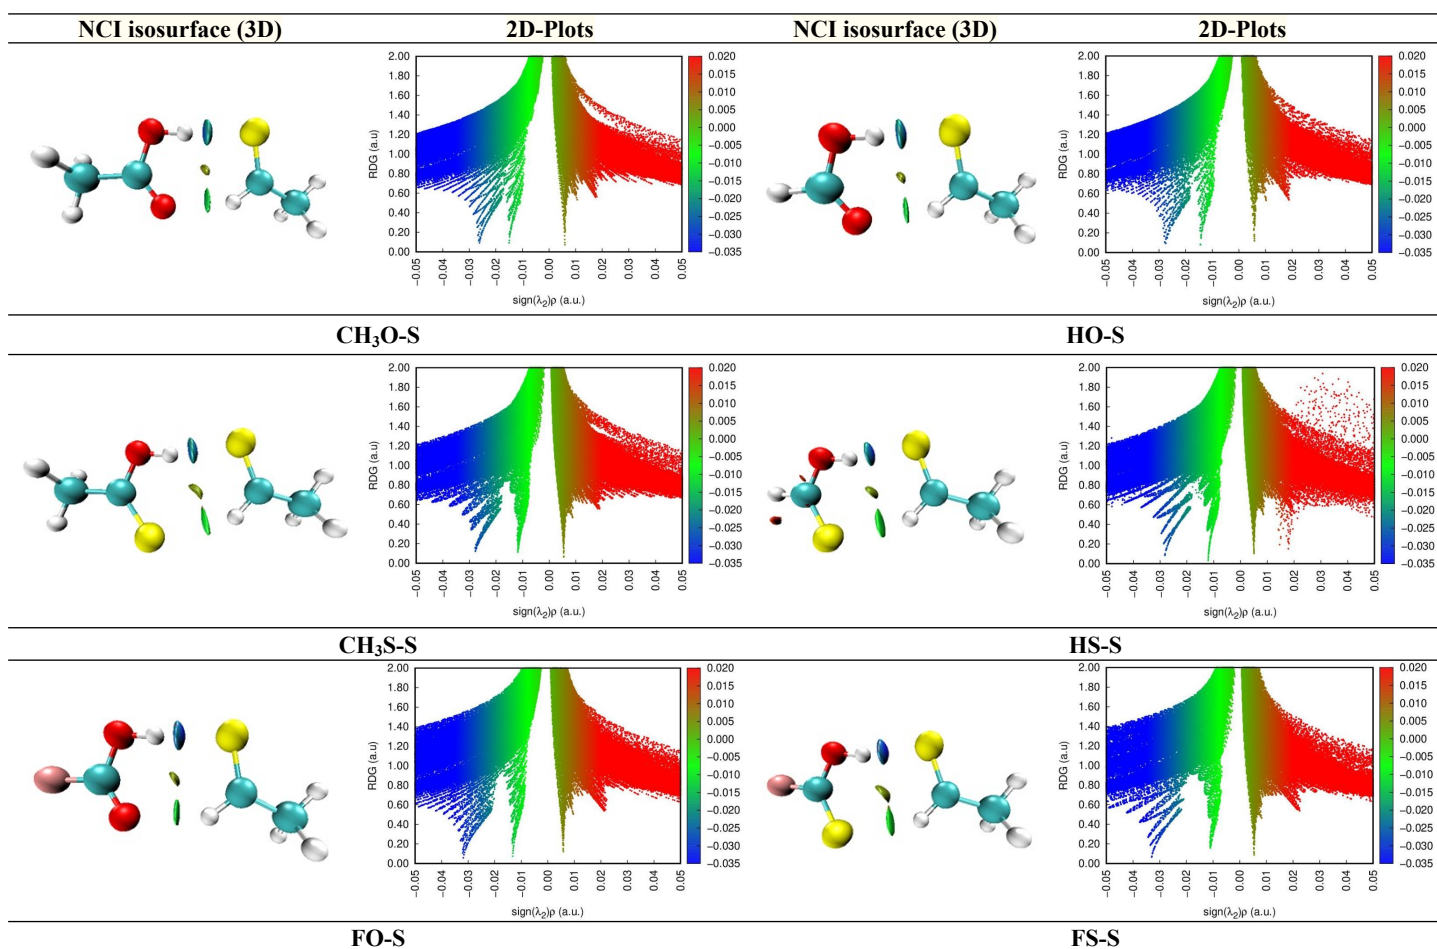

Figure. S5b. NCI isosurface and 2D-plots of reduced density gradient (RDG) versus the electron density multiplied by the sign of the second Hessian eigenvalue ( $\text{sign}(\lambda_2)\rho(r_c)$ ) for **RZ-S** complexes, with R= CH<sub>3</sub>, H, F; and Z = O, S  
(The surfaces are colored on a blue-green-red scale according to the values of  $\text{sign}(\lambda_2)\rho(r_c)$  ranging from  $-0.05$  to  $0.05$  au)

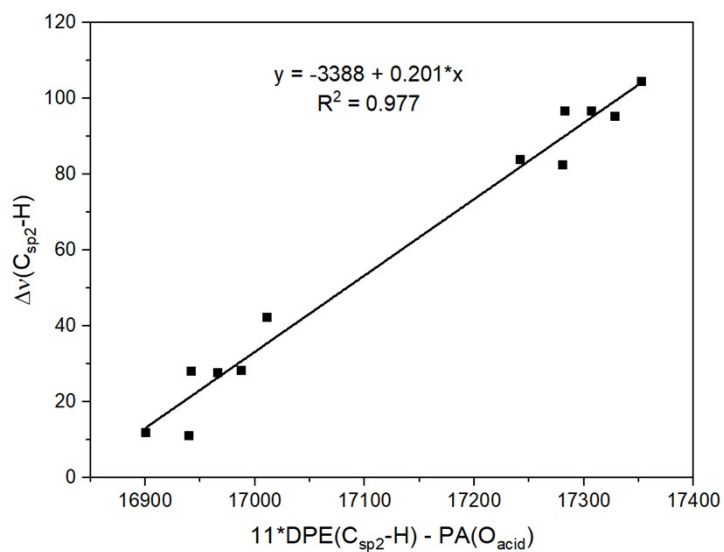

Figure. S6. The linear correlation of  $\Delta\nu(\text{C}_{\text{sp}^2}\text{-H})$  (in  $\text{cm}^{-1}$ ) versus  $\text{DPE}(\text{C}_{\text{sp}^2}\text{-H})$  (in  $\text{kJ}\cdot\text{mol}^{-1}$ ) of CH<sub>3</sub>CHZ and PA(O) (in  $\text{kJ}\cdot\text{mol}^{-1}$ ) of RCZOH

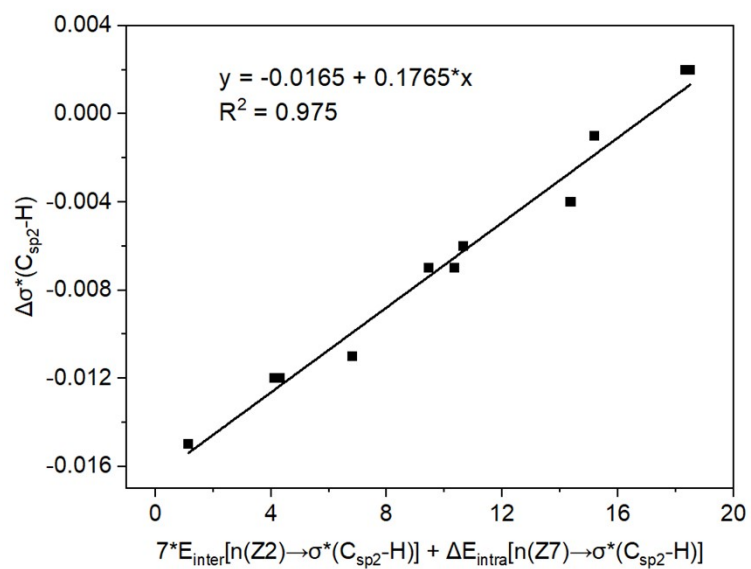

Figure. S7. The linear correlation of  $\Delta\sigma^*(C_{sp^2}-H)$  (in electron) versus intermolecular hyperconjugative interaction energies (in kJ.mol<sup>-1</sup>) and changes of intramolecular hyperconjugative interaction energies ( $7*E_{inter} + \Delta E_{intra}$ ) (in kJ.mol<sup>-1</sup>) for the complexes
